# Supplementary material for: Landscape and groundwater controls over boreal lake water chemistry and water balance heterogeneity in an esker complex of northeastern Ontario, Canada
Source: Copernicus journal article supplement (doi:10.5194/hess-2017-460), 2017-08-24
Supplement: Supplementary file [file hess-2017-460-AC1-supplement.pdf]

**Response to reviewer #1 comments on “Landscape and groundwater controls over boreal lake water chemistry and water balance heterogeneity in an esker complex of northeastern Ontario, Canada” by Boreux et al.**

In black: reviewer’s comments.

In blue: our answers and/or what we propose to add or to change in the manuscript.

We thank the reviewer for his through comments. These comments helped us to realize that the way our data was interpreted, presented and discussed and consequently how we could improve the manuscript. We will follow the majority of the reviewer's comments and suggestions when preparing the revised version of this manuscript.

**General comments**

This manuscript describing lake chemistry and physiography relative to elevation and positioning relative to a nearby esker is impressive in its scope (~50 lakes) and number of variables. The authors nicely show that lakes high in the landscape serve to recharge groundwater and lakes lower in the landscape receive groundwater discharge. Although impressive in the amount of data collected, the overall result of the study is not novel or surprising.

As mentioned our introduction, landscape position such as elevation is an important control on water chemistry and water balance. Thus we agree with the fact that the conclusion is “not surprising”, but we argue that it is novel and important. This study: (1) uses a large data set to document the importance of landscape position on lakes; (2) uses both conservative (isotopes) and non-conservative (chemistry) tracers to illustrate the importance of landscape position on lake hydrology; (3) illustrates the robust nature of this data set since the data in this study were collected at three different times; and (4) develops a lake typology that provides important generalizations. Also, by carrying this study in an esker complex, it can be compared with similar studies on other esker complexes (such as in Fennoscandia), which are common in boreal regions. Also, this study is particularly relevant in the context of paleohydrology/paleoclimatic studies from this region, as allowed us to assess the response of lake position to past climate change, in reference to landscape position over the Holocene.

The authors state that understanding lake position and relative sources and losses of water are important to lake stability in response to climate change. Their overall hypothesis is that exchange with groundwater is the most important factor related to the classification that they develop, but they rely on indirect evidence (chemistry and isotopes) to determine the type of lake and degree of groundwater-surface-water exchange.

We agree that direct evidence of groundwater-surface water interactions is more powerful than indirect evidence. However, setting up direct measurements of groundwater-surface water interactions such as seepage meters in 50 lakes multiple time would have needed a significant amount of time and monetary resources that simply were not available. Water tracers such as chemistry and isotopes are indeed an indirect evidence of such interactions and they have been proven to be reliable indirect indicators in the literature in a wide variety of settings.

Although interesting, their study does not address uncertainty and lacks confirmation of the extent to which chemistry and isotopes can serve in this function. I don't disagree with their conclusions; they seem logical and well founded. However, discussion about implications of assumptions and the possibility of misinterpretation of lake setting is missing.

We agree that our manuscript could benefit from including the implications of the assumption and the probability of misinterpretation. This will be included in the revision.

A slight change to the title may be more representative of the focus of this manuscript, which was to use lake water chemistry and water isotopes to infer exchange between groundwater and lakes. Rather than "Landscape and groundwater controls over boreal lake water chemistry and water balance heterogeneity. . .", it might be more accurate to title the study "Use of water isotopes and chemistry to infer the type and degree of exchange between groundwater and lakes in an esker complex of northeastern Ontario, Canada."

We agree with the reviewer that our main objective was to use tracers to infer groundwater-lake interactions rather than studying the processes *per se* and that the title could be more representative of our study. We thus suggest to rename the paper as suggested by the reviewer: "Use of water isotopes and chemistry to infer the type and degree of exchange between groundwater and lakes in an esker complex of northeastern Ontario, Canada"

A substantial product is the development of a classification scheme based on the authors' results. Numerous other classifications also have been proposed and it would be useful to compare the authors' classification system with one or more of the other lake-classification systems that have been published. Several that come to mind are: Born, S.M., Smith, S.A., and Stephenson, D.A., 1979, Hydrogeology of glacial-terrain lakes, with management and planning applications: *Journal of Hydrology*, v. 43, p. 7-43. Bracht-Flyr, B., Istanbuluoglu, E., and Fritz, S., 2013, A hydro-climatological lake classification model and its evaluation using global data: *Journal of Hydrology*, v. 486, no. 0, p. 376-383. Martin, S.L., Soranno, P.A., Bremigan, M.T., and Cheruvilil, K.S., 2011, Comparing hydrogeomorphic approaches to lake classification: *Environmental Management*, v. 48, no. 5, p. 957. Wentz, D.A., 1981, Lake classification - Is there method to this madness?: *U.S. Geological Survey Circular C0848-B*, 15-24 p. Winter, T.C., 1977, Classification of the hydrologic setting of lakes in the north central United States: *Water Resources Research*, v. 13, no. 4, p. 753-767.

We agree with the reviewer that comparing our lake typology with other published typologies would be beneficial to the manuscript and we will do so.

This manuscript appears to have been hastily prepared and the numerous errors were not only a distraction, in some cases they led to substantial confusion. The first example appears in the abstract, where the authors mix up groundwater recharge and groundwater discharge, calling lakes situated high in the landscape groundwater discharge lakes, and lakes situated low in the landscape groundwater recharge lakes. At first, I thought the authors were simply viewing the world from a lake perspective, where groundwater flowing to a lake would provide a recharge function to a lake. But no, the authors did adhere to the common usage for the terms groundwater recharge and discharge; they simply reversed terms in the abstract. I could easily overlook such a mistake, but so many other minor mistakes also are sprinkled liberally throughout the

manuscript that they represent a considerable distraction when attempting to follow the logic and conclusions of the manuscript. I provide indications of mistakes where they appear in the first few pages, but I leave it to the authors to carefully read their own manuscript and clean up the rest.

After reading the reviewer's comments and the manuscript we realized the presence of mistakes throughout the manuscript, which were confusing. We apologize for that and will make the necessary edits. We indeed view the world from a groundwater perspective and adhere to the common usage for the terms groundwater recharge and discharge. We will correct this in the abstract and throughout the manuscript based on the reviewer's comments.

### **Specific comments pertaining to line numbers**

20 Higher elevation lakes are usually groundwater recharge lakes and lower elevation lakes are usually groundwater discharge lakes. Here you state the opposite, which made me think you were viewing flow of groundwater to a lake as providing a recharge function to the lake. Based on the subsequent context of the manuscript, you clearly need to correct this as follows: “. . . higher-elevation groundwater recharge lakes from lower-elevation groundwater discharge lakes.” However, this provides an excellent example of how these terms are ambiguous and could easily mean the opposite from the perspective of a lake-centric scientist, who would view the addition of groundwater to a lake as serving a recharge function to the lake. Therefore, you need to define these terms in the introduction or the methods section so the reader clearly knows what you mean. You also use the terms discharge lake and drainage lake interchangeably. This is confusing. Since you first present the term discharge lake, and it is nicely contrary to recharge lake, I suggest you remove the term drainage lake and replace it everywhere with discharge lake.

We agree with the reviewer that the terms recharge and discharge are ambiguous and we will define early in the manuscript what we mean by those terms. In this paper, we adhere to the common usage for the terms groundwater recharge and discharge and view the world from a groundwater perspective.

72-73 You state here that you can determine evaporation and water balance provided the Craig-Gordon model is used. You state that the Craig Gordon model has to be used to do this, but then you surprisingly cite a paper published in 2015 the title of which implies it is all about software called Hydrocalculator. If you are using the CraigGordon model, you should cite Craig and Gordon, 1965. You also need to revise the sentence to indicate that this particular model is either somehow better or more convenient for accomplishing these purposes than the now standard method that is commonly used.

The explanation of the method seemed more intuitive in Skrzypek et al. (2015) than in the original paper, thus the reason to cite the latter reference. However, we do agree with the reviewer that the original paper should be cited. The change of citation will be changed. The other reviewer pointed flaws in the section on the methodology to determined water balance and this section will be rewritten.

78 You state there are few studies that have used both chemistry and water isotopes, and then you cite 4 such studies. In addition to those four studies, I can think of several more without even perusing the literature. This is not a “very limited number” especially relative to the number of studies in boreal lakes, which likely is smaller. Gurrieri, J.T., and Furniss, G., 2004, Estimation of groundwater exchange in alpine

lakes using non-steady mass-balance methods: *Journal of Hydrology*, v. 297, p. 187– 208. Krabbenhoft, D.P., Bowser, C.J., Kendall, C., and Gat, J.R., 1994, Use of oxygen- 18 and deuterium to assess the hydrology of groundwater-lake systems, in Baker, L.A., ed., *Environmental Chemistry of Lakes and Reservoirs*: American Chemical Society, p. 67-90. LaBaugh, J.W., Winter, T.C., Rosenberry, D.O., Schuster, P.F., Reddy, M.M., and Aiken, G.R., 1997, Hydrological and chemical estimates of the water balance of a closed-basin lake in north central Minnesota: *Water Resources Research*, v. 33, no. 12, p. 2799-2812. Katz, B.G., Coplen, T.B., Bullen, T.D., and Davis, J.H., 1997, Use of chemical and isotopic tracers to characterize the interactions between ground water and surface water in mantled karst: *Ground Water*, v. 35, no. 6, p. 1014-1028. Turner, J.V., and Townley, L.R., 2006, Determination of groundwater flow-through regimes of shallow lakes and wetlands from numerical analysis of stable isotope and chloride tracer distribution patterns: *Journal of Hydrology*, v. 320, no. 3-4, p. 451-483.

We do agree with the reviewer that there was not only a limited number of studies that used both water chemistry and isotopes to investigate groundwater-lake water connections. Our phrase was awkwardly worded in the sense that we meant few studies have used such a combined approach on the scale of the landscape and most studies used only one approach (isotopic or chemical). We clarify this in the revision, and provide appropriate citations.

148-149 Evidently you are only considering watershed slopes for the terrain that is within 100 m of the lake shoreline. For most lakes, this will be a small percentage of the lake watershed. You need to indicate why you are applying this 100-m filter to your analysis.

The coarse spatial resolution of the DEM and the close proximity of the lakes in the study area made it impossible for ArcGIS to compute the watershed delineation of each lake. Because all lakes are kettles (which are characterized by steep slopes on their shore over a small distance) and nearby, arbitrary buffer zone widths of 50 m and 100 m were tested and displayed similar correlations with lake isotopic composition: Max slope 100 m ( $r=-0.33$ ,  $p=0.02$ ), Max slope 50 m ( $r=-0.31$ ,  $p=0.03$ ). We will clarify in the revision.

234-235 Most studies that use water isotopes to look at water budgets go to considerable effort to measure or estimate  $\delta E$ . Here you simply assume that  $\delta E = \delta I$  minus  $\delta L$ . This method assumes that you know all of the other input and loss volumes and their integrated isotopic signatures. You should address this issue and either indicate that your assumed method for determining  $\delta E$  is well supported by other studies or you should state that this method includes uncertainty associated with all of those other water-budget terms.

We agree with the reviewer that the provided equation was in error, and thank the reviewer for pointing out our mistake. We originally aimed at summarizing this section as much as possible as this method has been used in several papers and we accidentally listed a wrong formula. Thus, more text and details will be provided and in the rewrite of this section (see response to reviewer #2).

244 Because this manuscript is about groundwater and lakes, you should indicate what the groundwater temperatures are in this area. Temperatures of springs are not an accurate indication of groundwater temperature because spring temperature at the discharge point is so influenced by the velocity of the discharging spring and the resulting warming of the discharging water as it approaches the surface.

Secondly, is there a difference in lake temperature between the higher and lower lakes? If you have substantially more groundwater discharge in the lower lakes you may see a resulting temperature difference in lake temperature. This is unlikely, however, because so many other factors also affect temperature, but with 50 lakes there may be something.

The Provincial Groundwater Monitoring Network of the province of Ontario of Canada (where the study area is located) monitor 3 groundwater wells in the area (water level and water chemistry) but does not report any water temperature measurements. Thus we do not have direct measurements of groundwater temperature.

We agree with the reviewer that “the temperatures of springs are not an accurate indication of groundwater temperature because spring temperature at the discharge point is so influenced by the velocity of the discharging spring and the resulting warming of the discharging water as it approaches the surface. However, by referring to the temperature of springs, we do not interpret it to be an indicator of the temperature of groundwater but we looked at the temperature of spring to infer that those were indeed springs (due to their lower temperature). Some spring samples were taken from wells build by locals, which fore sure introduce a bias in the data. This will be clarified in the revision.

Interestingly the temperature was recorded to test whether lakes that have a greater proportion of their water balance coming from groundwater had colder temperatures or not (even though we did not really expect to find such a relationship). This was not the case as supported by statistical analyses in the appendix. Lake size was correlated with water temperature as bigger bodies warm more slowly and cool down slower in comparison to smaller ones.

256-257 It would be very useful if you could include here a figure that maps the lakes with indications of the isotopic value (select 18-O or deuterium) and perhaps also the specific conductance. This would allow the reader to see the spatial distribution of the various isotopic values that are indicated in this paragraph. If you do this, please also show the lakes that have a stream outlet and indicate where that stream goes. As I read farther I see that Figure 5 does a reasonable job of showing this but it lacks mapping of the isotopic lake values. Ultimately, what would be most useful is a map showing the resulting distribution of recharge, seepage, and discharge lakes, perhaps overlain on a map that uses shading to show elevation.

Because the E/I calculation is based on  $\delta^{18}\text{O}$ , we didn't include a map with the lake isotopic values as we thought this would be redundant. However, we acknowledge the fact that this might be of interest to some readers. The addition of a map showing the distribution of lake types in the landscape is an interesting suggestion. Because we are concerned with not overcrowding the manuscript with figures, we will add those this additional information on a more complex figure as supplemental information.

266 The slope of your relation is negative but the r-squared value should be positive.

This is a major typo. Coefficients of determination cannot have negative values. Following the reviewer's comments, we will make the necessary changes throughout the manuscript and present the correlation coefficient.

266 It is not the geographic position that is related. It is the elevation that is related. You may infer from the elevation the position of the lake relative to the crest or the distance from the crest. If that is the case, you should state that here.

Correct. Elevation that is related to water isotopic composition and chemistry. Geographic position was used as a synonym but we agree that this terminology was confusing, and will correct.

268-269 You state the relation between isotopes and elevation. You should, therefore, also provide a sentence and state the relation between EC and elevation.

We agree with the reviewer and will state the relation between EC and elevation as well.

277 Why are you relating E to I? You stated in the Methods that you can do this but you didn't say why. You should explain what this accomplishes. Also, since you're determining  $\delta E$  from  $\delta I$  minus  $\delta O$ , your equation 5 is really  $\delta I - \delta L / \delta I - 2\delta L$ .

We can relate E to I assuming that the lakes are in isotopic steady state. This assumption seems well justified as the lakes have had a lot of time in the past to reach their isotopic steady-state which is reflective of the local climate and their mean hydrological status, and can be defined by its water balance (which corresponds to the ratio of the total inflow to the evaporation rate, Isokangas et al., 2015). As also pointed out by the other reviewer, the formula for  $\delta E$  has been corrected, and the methodology for the calculation of water balance has been rewritten (see response to reviewer #2).

Reference: Isokangas, E., Rozanski, K., Rossi, P.M., Ronkanen, A.K. and Kløve, B.: Quantifying groundwater dependence of a sub-polar lake cluster in Finland using an isotope mass balance approach, *Hydrol. Earth Syst. Sci.*, 19, 1247-1262, <https://doi.org/10.5194/hess-19-1247-2015>, 2015.

277-278 A small E/I could also simply indicate that the lake has an outlet ( $I \sim Q$ ) and, therefore, a short residence time, which has nothing to do with any indication of whether groundwater or springs undergo evaporation or not. Interpretations related to E/I also incorporate error associated with calculating  $\delta E$  rather than measuring it.

We agree with the reviewer's comment that residence times are key here and will address this.

Figure 4 I don't understand how you can obtain E/I values for springs and streams when your two variables for making this calculation are  $\delta I$  and  $\delta L$ . What lake do you use to determine  $\delta L$  for a spring or a stream?

In that case we treated the spring water samples as if they were a spring or a lake and used the same methodology. We will clarify in the methods that we used  $\delta G$  for groundwater and  $\delta S$  for springs.

297 You can't have a negative R-squared value. These values must instead be correlation coefficients, which are usually indicated as lower-case r. Also, where do you present these values? DOC is not included in the correlation matrix in Table S1b in the Appendix. You do show TN but the value for r when TN is



related to H (elevation) is 0.05, not 0.22 as reported here. And since we're talking about the table, why is the table labeled S1b? Is there a table S1A that is missing?

Agree. We will use correlations. DOC is indeed included in Tab. S1b but under the label NPOC, we will change this so that the names of the variables is consistent throughout the manuscript. The errors have been corrected. All correlation values ( $r$ ) are displayed in Tab S1a and b. There is no Tab A1. The journal asked us to rename Tab A1 to Tab S1 and not all notations were changed.

315 What is  $d$  in Table 1? Is it deuterium excess? If so, you have not defined or describe this anywhere.

$d$  indeed corresponds to deuterium excess, we will specify and define it in the manuscript.

320 Be sure to clearly show any surface-water connections between lakes. The presence of an outlet, or of surface-water flow from one lake to another, is an important part of your analysis and up to now the reader has not been able to see these connections. You could show this either here or in Figure 1.

We will add the outlets in Fig 1 as suggested.

325 You use an elevation of 242 m as the dividing line between recharge and discharge lakes. However, in Figure 5, and in the previous paragraph, you show a middle elevation, or an elevation break point of just over 280 m. And there is no elevation in Figure 5 lower than 260 m in Figure 5. If all of the lakes shown in Figure 5 are higher than 260 m, and your previously determined break-point elevation was 282.4 m, how can you now choose an elevation of 242 m to separate your lakes?

The elevation of the breakpoint line is indeed 282 m, not 242 m (as accurately mentioned by the reviewer, there is no elevation lower than 260 in our study area). This is an unfortunate typo.

327 What additional lake characteristics were used to allow you to divide the lakes into three categories?

Other lake characteristics include the lake's pH, the presence or absence of an outlet, the lake size, depth and DOC content. This will be added in the text in brackets.

336 How does this value of 242 m relate to your break-point elevation of 282.4 m? If indeed these are two separate distinguishing elevations, you need to describe how one is important relative to the other.

The elevation is 282 m, not 242 m. A previous typo earlier in the manuscript made it confusing. This will be corrected.

370-371 Here you finally indicate that your streams are all upgradient of a lake and that you evidently did not sample any stream reaches that were situated between lakes. This is an important distinction that needs to be made clear much earlier in the manuscript.

We did sample upgradient streams as well as outlets that flow into other lakes (mainly into Frederick House Lake, which feeds the Frederick House River that drains the whole area). We will make this clearer early

in the manuscript as suggested. All the lakes mentioned in the manuscript will be labelled in the map as previously suggested and streams will be added to the map of the area as well.

416-417 You should not assume that a recharge lake is perched. I greatly doubt that lakes situated in permeable material such as you have in the esker are perched. Unless you have separate information indicating otherwise, you should remove the word perched from the manuscript.

We agree with the reviewer that the assumption that a recharge lake is perched is erroneous as esker are indeed made of permeable material. The term “perched” was wrongly used as a synonym of recharge, which is not. This will be corrected.

433 Here you do report values as R rather than R-squared.

As commented above, changes will be made and only r values will be reported.

444 The presence or absence of an outlet is a very important variable in this analysis and this is the first time you have brought up this point. I would think this would be a presence-absence type of variable that would have been part of your statistical analysis. In any case, I was looking for outlets in the figures and it was very difficult to determine whether you showed all of the outlets or not. For some lakes, based on their positioning I would expect an outlet and yet one is not shown in the figure. If you do show all of the stream segments in your study area, there is a surprisingly small number. If not, you should revise the figure to do so. The presence of both inlets and outlets is important to this type of analysis.

The presence or absence of an outlet was investigated with a logistic regression (lines 462-467). The figure will be revised to include all known outlets and streams in the area. However, the local topographic maps don't display all the streams observed in the field and in satellite imagery due to the presence of a dense forest. Thus the updated map might not be exhaustive of all streams in the area but all known streams and streams that appear distinctively in satellite images will be included.

455 You should label and show in a map where these two lakes are.

Those lakes will be labelled in a map in the appendix as suggested.

455-460 A lake without an outlet could also be due to the lake being able to easily lose water to groundwater.

We totally agree with the reviewer and this argument will be added and commented in the manuscript.

473 What is a mounded recharge lake? This needs to be defined. If this is a lake that loses water everywhere to groundwater, you can't call that mounded unless you have hydraulic gradient data to confirm that. It may instead be that the lake is situated in a small local watershed or that it has more organic sediments than others that creates a low pH.

Mounded lakes are lakes positioned above the water table that receive most of their water input from direct precipitation as defined by the ALSC Lake Classification System (Newton and Driscoll, 1990). We agree



with the reviewer that labelling those lakes as mounded without knowing the hydraulic gradient might be incorrect. Given this, we will remove this terminology. We agree with the reviewer that those lakes are just situated in a smaller local watershed.

Reference: Newton, R.M. and Driscoll, C.T.: Classification of ALSC lakes, in: Adirondack Lakes Survey: An Interpretive Analysis of Fish Communities and Water Chemistry, 1984-87, Adirondack Lakes Survey Corporation, Ray Brook, NY., 2-70 to 2-91, 1990.

Figure 8 What distinguishes a recharge seepage lake from a discharge seepage lake? Is it only the pH? You talk considerably about recharge seepage lakes and the reasons for their classification, but you say nothing about discharge seepage lakes or how they are different from recharge seepage lakes.

Those two lakes are distinguished by their position: in the groundwater discharge zone or the groundwater recharge zone inferred from the breakpoint analysis. This will be highlighted in the manuscript.

520 Here you finally define a drainage lake. Given that this indeed is the same as a discharge lake, I suggest you use one term or the other and do not use both interchangeably.

Agreed.

545-551 Greater lake evaporation also is related to more isotopically enriched water in lakes. If there is lake-to-lake variation in evaporation, that variation affects your interpretation of the extent to which the lake exchanges water with groundwater. Your classification system does not provide any indication of the extent to which other factors affect your interpretation of exchange with groundwater. It would be helpful to point this out in this paragraph.

We agree, and will include this in the discussion. Although lake morphometry can influence isotopic values, elevation accounts for much more variance in isotopic composition ( $r=0.53$ ,  $p<0.001$ ) and trumps the influence of variations in evaporation between lakes. We will address this in more details in the revised manuscript.

567-568 You cannot make this statement unless you either have evaporation data to back this up or you can cite some papers that have reached this conclusion. I strongly doubt that evaporation from lakes that receive groundwater discharge is measurably different from lakes that recharge groundwater. What is different is the degree of isotopic enrichment in the lake water. The evaporative enrichment is masked by isotopically light groundwater.

We agree with the reviewer's comment and we realized that that sentence was poorly worded. We will replace "changes in evaporation" by "changes in water balance".

591-592 This logic is not complete. If drought reduces groundwater flow to a lake because of reduced water-table elevation, why then would there not be increased flow of lake water to groundwater on the downgradient side of the lake, in which case there would be no net change in exchange with solutes?

We agree. Recharge lakes would feed the groundwater system by lake outseepage, which would produce no net change in solutes.

598-599 Residence time would be much more greatly controlled by local hydraulic conductivity. If most of your recharge lakes are situated on the esker, then I would think residence time would be relatively short compared to a lake lower in your system that is situated in lower-permeability sediments.

We agree with the reviewer that residence times can be related to the permeability of the material it is embedded in. However, residence times are a reflection of both watershed size and lake volume. In our study area, lakes at lower elevation tend to be much shallower and have larger watersheds, resulting in increased flushing. We will discuss this in the revision.

607-614 This paragraph is poorly presented and is confusing. What do you mean by multiple site selection? What sites are you talking about and for what are they being selected? How is this related to paleohydrological reconstruction?

Site selection is meant in reference to lake selection for a paleohydrology/paleoclimatic studies from the lake sediments. Hence, knowledge of present-day hydrology and connection to the groundwater is important. For example, choosing a groundwater discharge lake for a paleo study may show stability, whereas a higher elevation groundwater recharge lake may be more sensitive. Our study provides the modern-day context for lake selection.

### **Technical corrections**

22-23 You need to place a comma after contrast and remove the comma after lakes so the sentence reads “In contrast, groundwater discharge lakes were isotopically depleted . . .”

This will be adapted in the text as suggested.

31-32 You should remove the parentheses here; otherwise, the sentence is not complete. Also, how can you determine seasonal differences in chemistry when you only have data between early June and August? That period is during summer only.

The parenthesis will be removed as suggested. As the reviewer mentions below, “seasonally” implies comparisons over multiple seasons. Technically, early June is still in the spring and August is in the summer. Plus, in those settings, summers are usually shorter than at lower latitudes so the notion of season still makes sense here. But at the same time, we agree that the usage of the term season is debateable. Therefore we will use the term summertime instead.

34-35 Recharge lakes also are affected by changes of greater duration and persistence. Please add the word “only” to write “. . . affected only by hydroclimatological changes of greater duration and persistence.”

This will be adapted in the text as suggested.

47-48 The threat of climate change will not influence lakes. It is the climate change that will influence lakes. Therefore, remove “The threat of” and start the sentence with “Future climate change will. . .”

This will be adapted in the text as suggested.

49 A word is missing. Insert “understand” to write “. . . to better understand relationships of lake hydrology . . .”

This will be adapted in the text as suggested.

55 Another word is missing. Insert “to” to write “. . . the opportunity to better understand . . .”

This will be adapted in the text as suggested.

64 Now you have an extra word. Delete the word “changing”.

This will be adapted in the text as suggested.

70 Change tracers to tracer because it needs to be singular here.

This will be adapted in the text as suggested.

72 What is a “time and cost effective means”? Perhaps you mean “an efficient and cost-effective means”

Yes, “time and cost effective means” will be replaced by: “an efficient and cost-effective means”.

98 You state this is near Timmins but you do not show Timmins anywhere on the map. Please add the location of Timmins to the map. You also need to add labels to show the locations of Frederick House and Night Hawk Lakes.

The city of Timmins will be added to the map and the location of cited lakes will be labelled also.

110 What is a poplar? I suspect you actually mean poplar.

The correction to poplar will be made. The error was likely due to an automatic correction by Word.

124 I suggest you add the word littoral to write “. . . forming lateral littoral sand units that drape . . .”. This addition will provide a better tie with the “littoral sand” indicated in Figure 1.

This will be adapted in the text as suggested.

125 You have an extra and unnecessary word here. Delete the word “in” to write “The numerous kettle lakes on the esker formed . . .”

This will be corrected in the text as suggested.

128 Why does only the esker crest have high-K sediments? I would think the entire esker would be much higher in K than your surrounding sediments. If it is just the upper portion of the esker that serves as an aquifer, you need to explain why this esker is geologically different from other eskers.

The reviewer is correct that the whole esker has high K-sediments. The word “crest” has no place here. This will be corrected in the text.

145 Depths of what? You should write “maximum lake depths” so the reader will know you are not talking about depths of other geographic features.

We will write “maximum lake depths” to make it clear to the reader.

147-148 What does spatial resolution have to do with lake-surface elevation? This needs a better explanation.

In ArcGIS, the elevation of a polygon (here a lake) can be obtained from a Digital Elevation Model using the spatial statistics extension. When requesting the calculation, the software asks whether you want to use the mean, max or min value and we selected mean.

153 You were only there for one week each time? That certainly does not constitute a season. You should replace the word season with something else; perhaps field campaigns or field trips.

The word season will be replaced by campaign as suggested.

154 Earlier you state that the number of lakes is 50, but here you say that this number is approximate. Surely you know how many lakes you sampled and you should provide that number. Otherwise, this text gives the impression that you can't be bothered with counting up the lakes you sampled or that you were not very meticulous. I suspect this is not the case, but this and the numerous previously identified simple mistakes certainly give a reader pause.

The word approximately will be erased. There was indeed 50 lakes sampled.

163 The word is triple-rinse, not tripled- rinsed. This mistake is repeated on line 164.

This will be adapted in the text as suggested in lines 163 and 164.

164 You say bottles were “and again with sample water,” which I presume to mean that you triple-rinsed the bottle with sample water after the bottle was triple rinsed with distilled water. But then in the next sentence you write that bottles were triple-rinsed with lake water. Is this simply a mistake or redundancy in your writing or did you rinse the bottles in lake water twice?

Bottles were triple rinsed with distilled water off-site first, then triple rinsed with sample water on-site. We will reword this phrase to make it clearer.

170 Apparatus should be replaced with apparati because the following word, “were”, is plural.

This will be adapted in the text as suggested.

171 Filtrate is singular but that word is followed by were, which is plural. Either change filtrate to filtrates or change were to was.

We will make the correction and change “filtrate” to “filtrates”.

172 One does not store into. The samples were either stored or they were placed into.

We will make the correction and delete the word “into”.

198 Change detections to detection.

This will be adapted in the text as suggested.

201 Detections limits should be change to detection limit.

This will be adapted in the text as suggested.

202 You already defined these three terms in lines 177-178 so you do not need to do so a second time here.

This will be adapted in the text as suggested.

203 What is NDIR? You need to indicate what this abbreviation indicates. Also, since it is only used once in the manuscript, it would be better to simply indicate what this is.

We agree with the reviewer’s point. We will change NDIR to “nondispersive infrared sensor”.

204 Change detections to detection.

This will be adapted in the text as suggested.

207 You need to indicate what TIC is. I assume it is total inorganic carbon. If so, how was this determined? You do not say. Is TIC only the dissolved portion of the sample?

TIC is indeed total inorganic carbon. This variable was actually not used in our analysis and is not mentioned anywhere else in the manuscript. It must have been left in the method section by accident.

269-270 You could consider deleting this sentence. It is fairly standard practice to just use 18-O (most common) or 2-H and you've already shown the strong correlation in Figure 2. You might also modify slightly to write "... are enriched in 18-O, and due to their strong correlation, 2-H."

We will delete this sentence as suggested. Even though we agree it is a standard practice to use  $^{18}\text{O}$  rather than  $^2\text{H}$ , we thought it might have been worthwhile to mention it in case the reader would wonder why we seem to omit referring to  $^2\text{H}$ .

288 Delete "it" to write "As is the case with stable isotope values. . ."

This will be adapted in the text as suggested.

332-333 This sentence does not make sense. I can't tell if there are missing words, or if infer is supposed to be inter. In any case, the text in quotations needs to be corrected: "In order to better understand the contribution of infer water chemistry variables,"

We agree with the reviewer that the sentence in quotation marks doesn't make sense. We will reword "In order to better understand the contribution of infer water chemistry variables," to "In order to better understand how water tracers vary in those two zones".

342 The table caption states that some lakes are labeled in red. The figure is in black and white (although Figure 5 is in color) so nothing is shown in red here.

We will modify this sentence as the figure is in black and white. The figure used to be in color in a previous draft and was changed to black and white for the journal. We will make the appropriate edits.

349 Panel A shows inter-annual change and panel B shows variability over a single summer; the citation should be to Fig. 7a,b). However, "seasonally" implies comparisons over multiple seasons. Your analysis is not seasonal. You only compared values over parts of one season, that being summer. Therefore, you should replace any inference to a seasonal analysis to something like "summertime" or "over-summer".

We will use the terms at the beginning and towards the end of the growing season to identify the June and the August campaigns. The text will be changed to refer to Fig 7 a,b (although this figure will be moved to the discussion, following the suggestion of the other reviewer).

355 Here you again refer to panel B but the solute-related panels are 7c and 7d.

The text will be changed to refer to Fig 7 c,d (although this figure will be moved to the discussion, following the other reviewer's comments).

393 Please remove the hyphen between lake and water.

This will be adapted in the text as suggested.

428 Replace delivery with deliver. In fact, this entire paragraph could use considerable help.

This will be adapted in the text as suggested. Edits will be made to improve the quality of the entire paragraph as suggested.

448 Here you use lower-case r. Thus far you have used R, R-squared, r, and r-squared. Do they all mean the same thing in this manuscript? They certainly mean different things in statistics. You need to thoroughly review the manuscript and present your variables and statistical indicators in a consistent manner.

Yes, this will all be corrected and made consistent.

455-471 There are numerous problems with sentence structure, grammar, and lack of clarity in meaning.

We will improve the grammar throughout the manuscript.

487-489 I have no idea what this means; it seems completely out of context. Please revise for clarity.

We will rewrite.

554-555 You use relation and relationship interchangeably. I suggest you select one word and use it consistently. I was once told that people have relationships but data indicate relations.

This will be adapted in the text as suggested.

587 This should be Figure 7B, not Figure 8B.

This will be adapted in the text as suggested.
